# Supplementary material
Source: MDPI journal article supplement (https://www.mdpi.com/2075-163X/10/7/608)
Supplement: s1 [file s1]

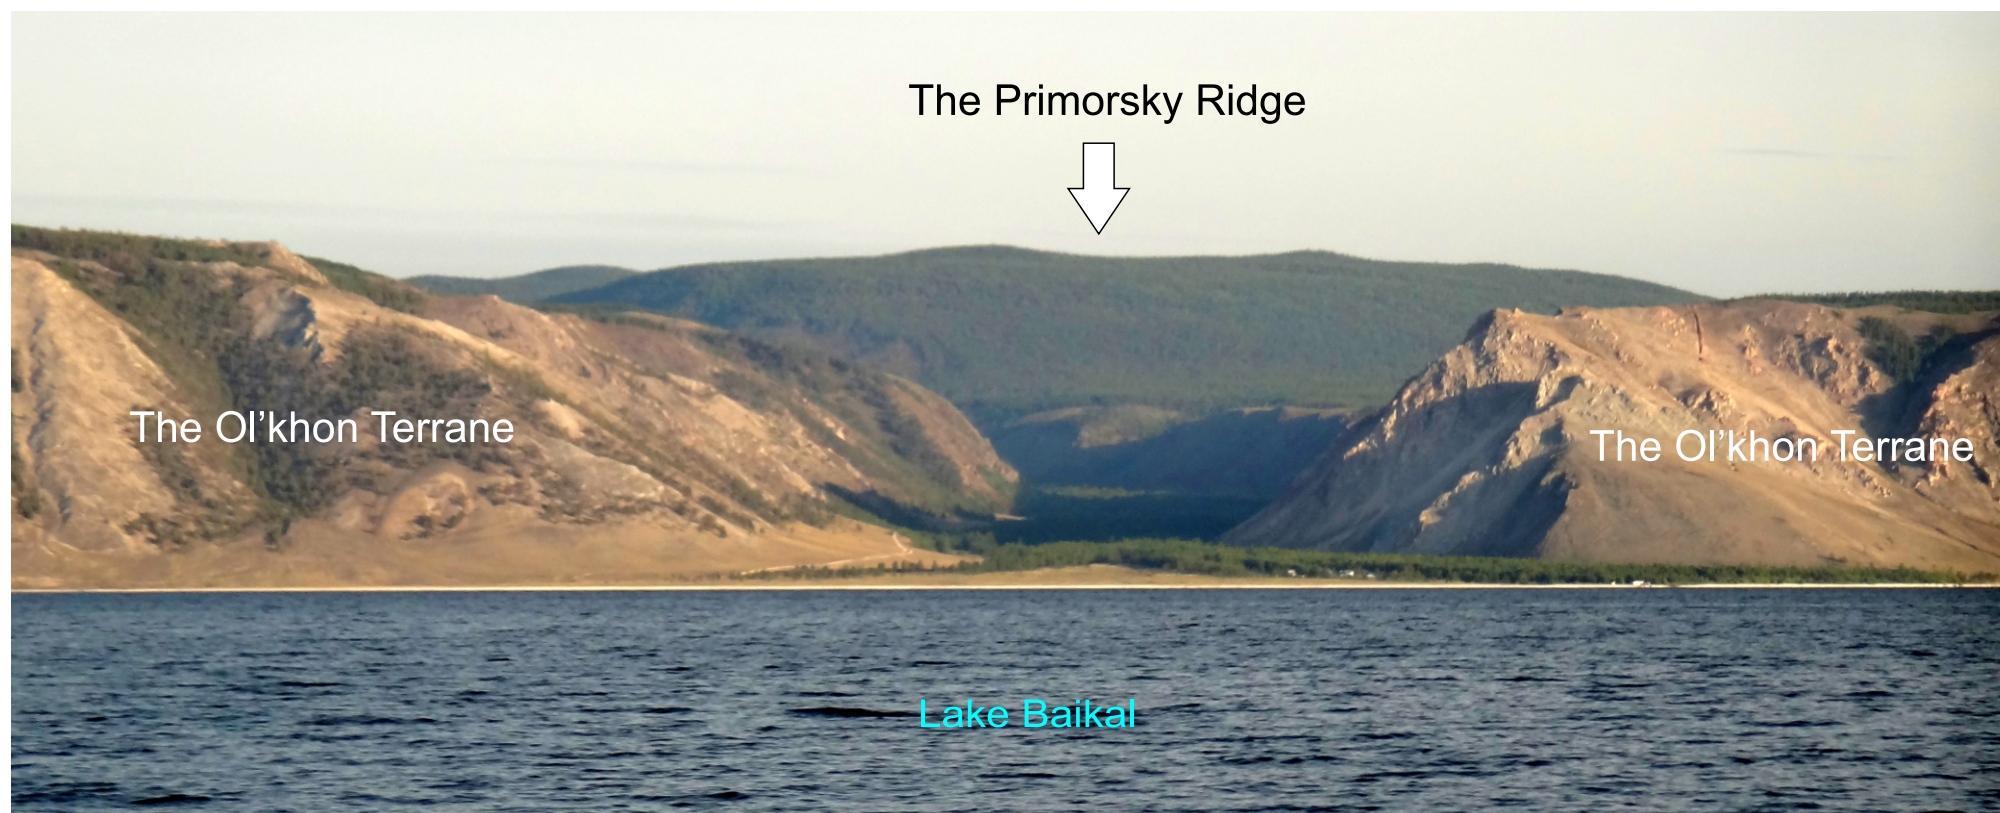

Figure S1. View of the Primorsky Ridge from Lake Baikal.



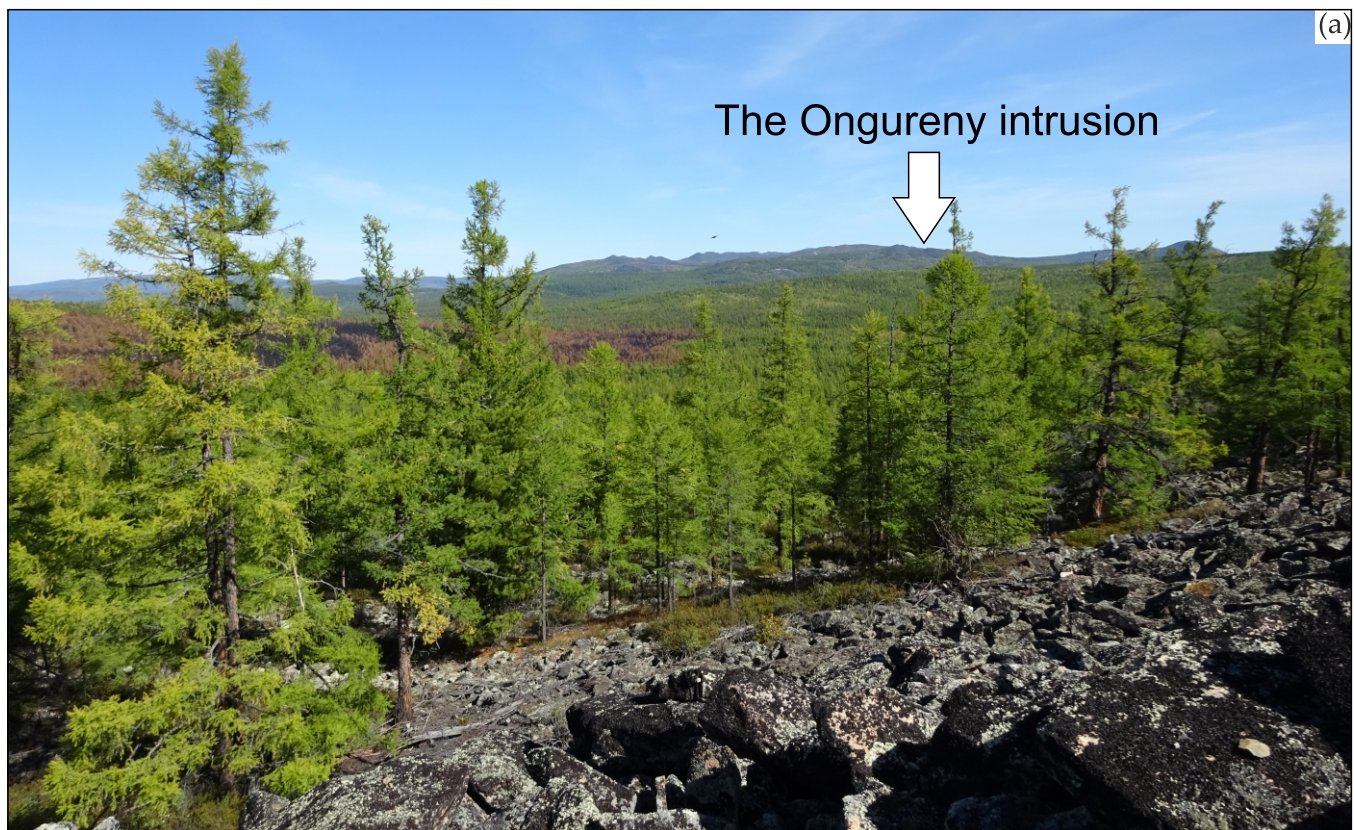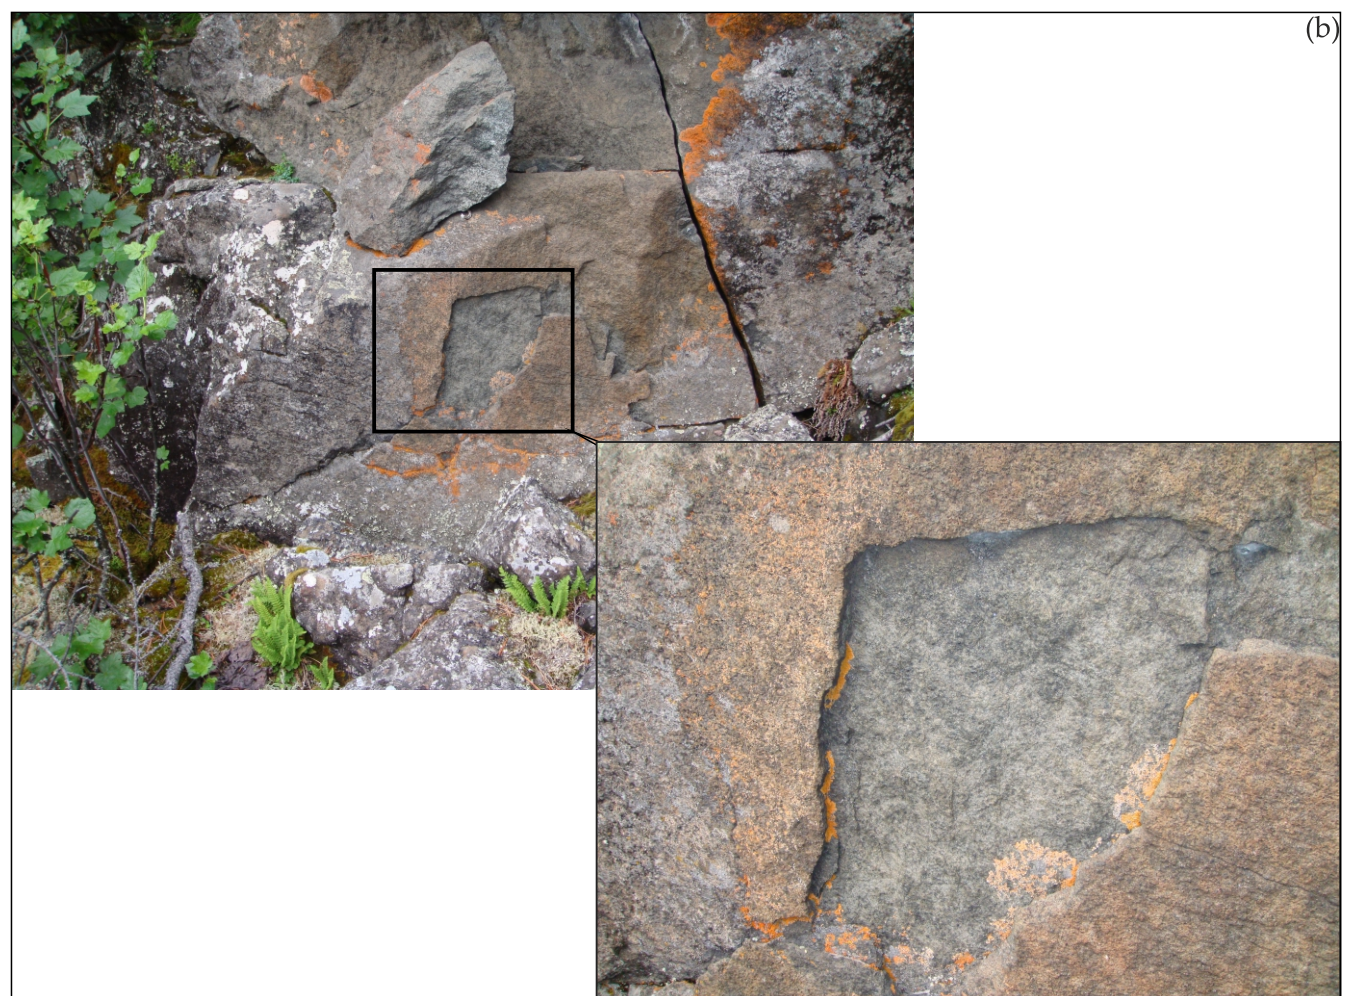

Figure S2. (a) View of the Onguren intrusion from the Zunduk intrusion; (b) The outcrop of the Onguren intrusion ultramafic rocks.



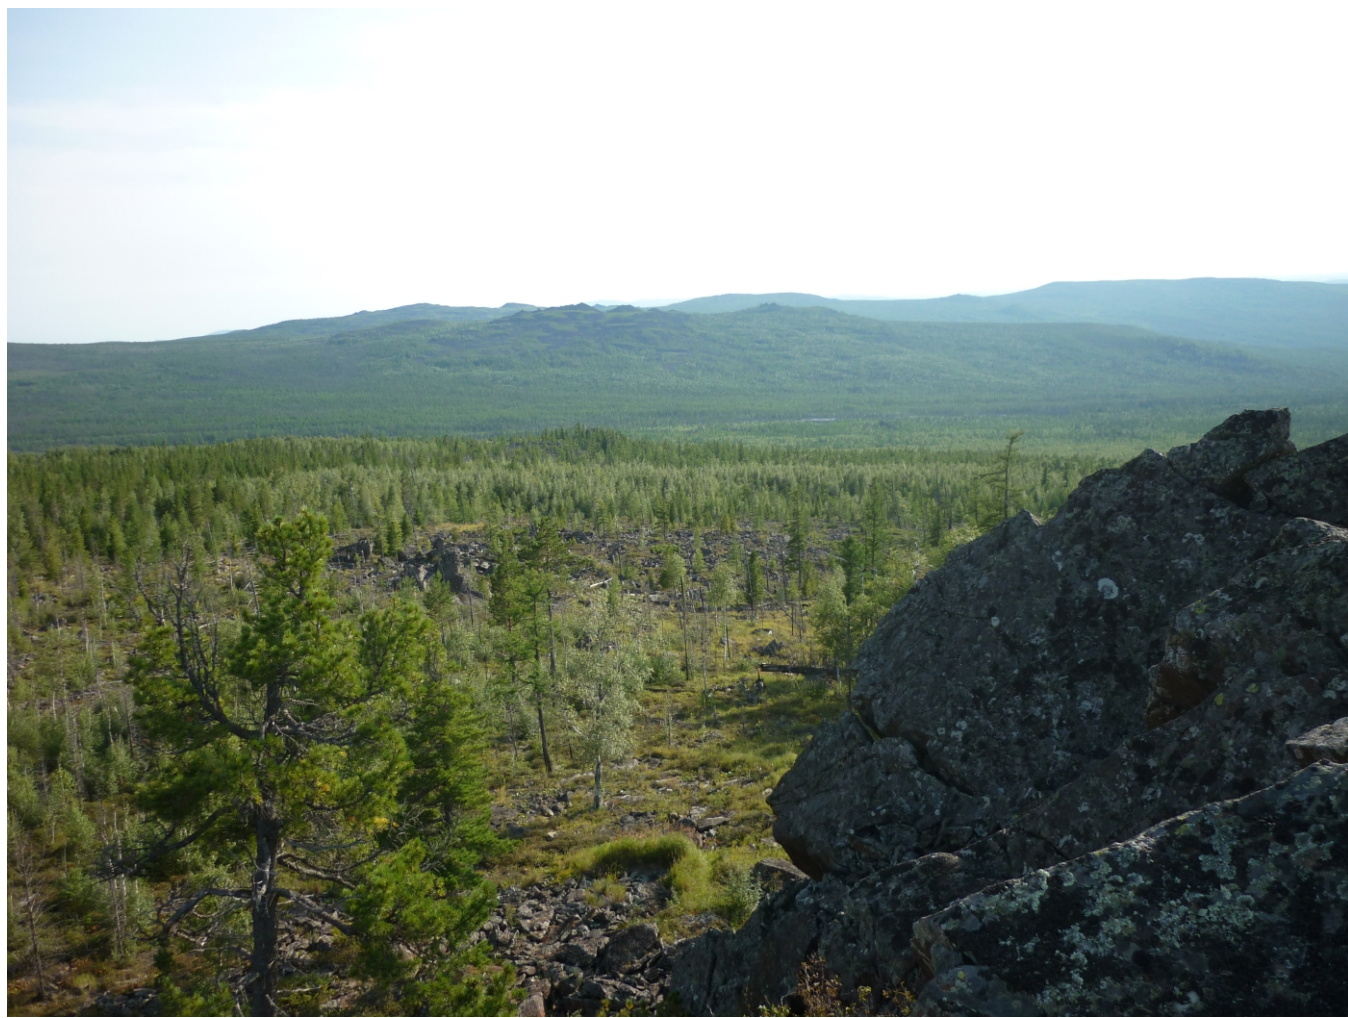

Figure S3. The outcrop of the Ulan-Khan intrusion.

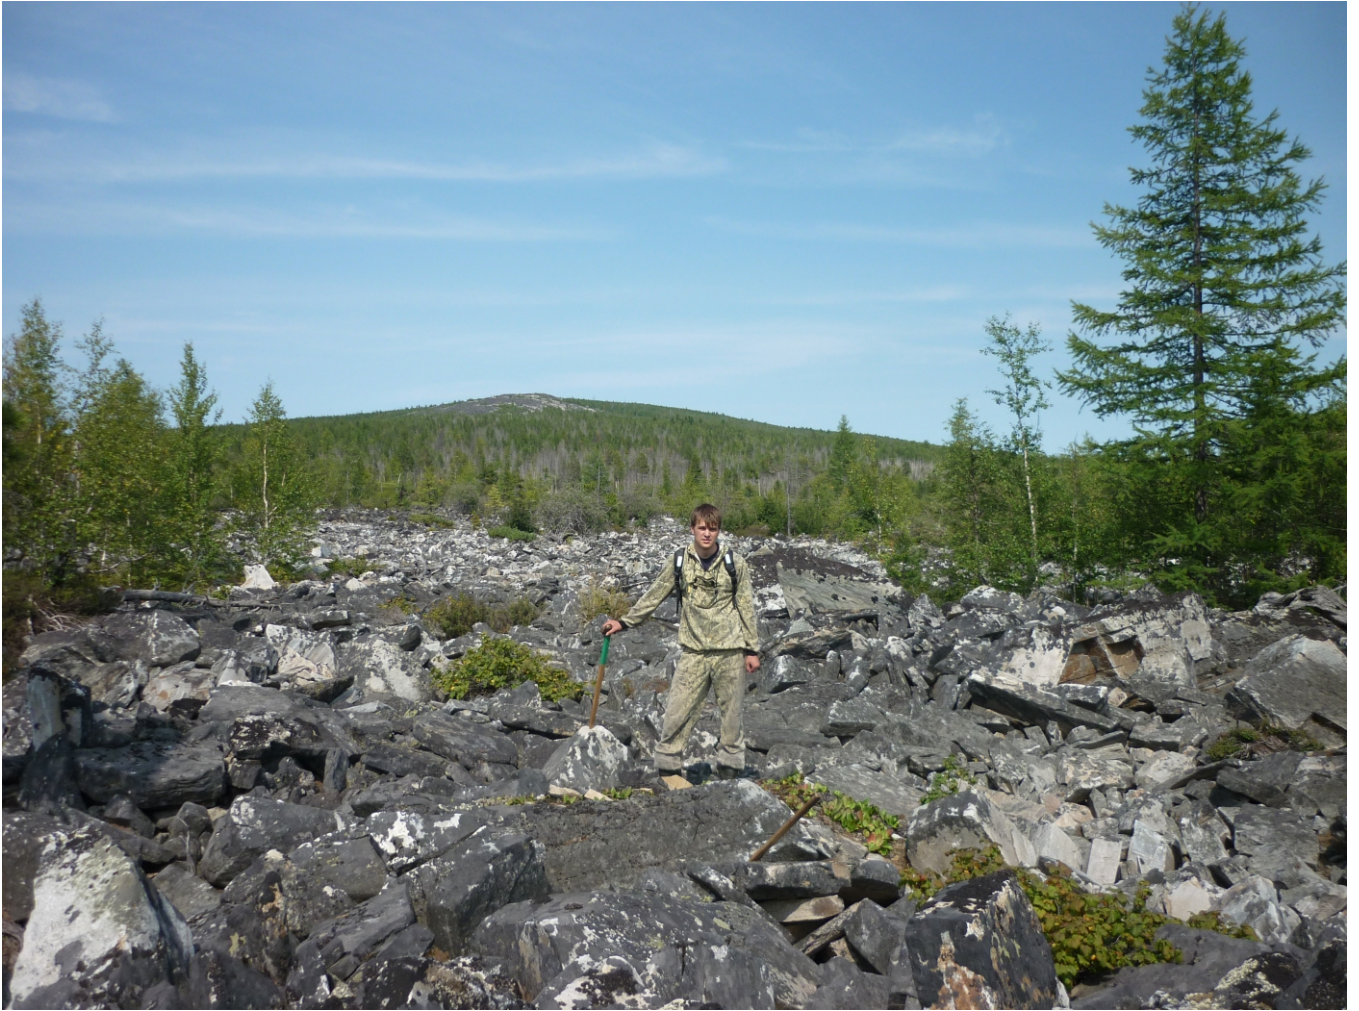

Figure S4. Large blocks of eluvium, the Moriany intrusion.  
In the photo for scale there is Artemii Doroshkov, his height is 205 cm.

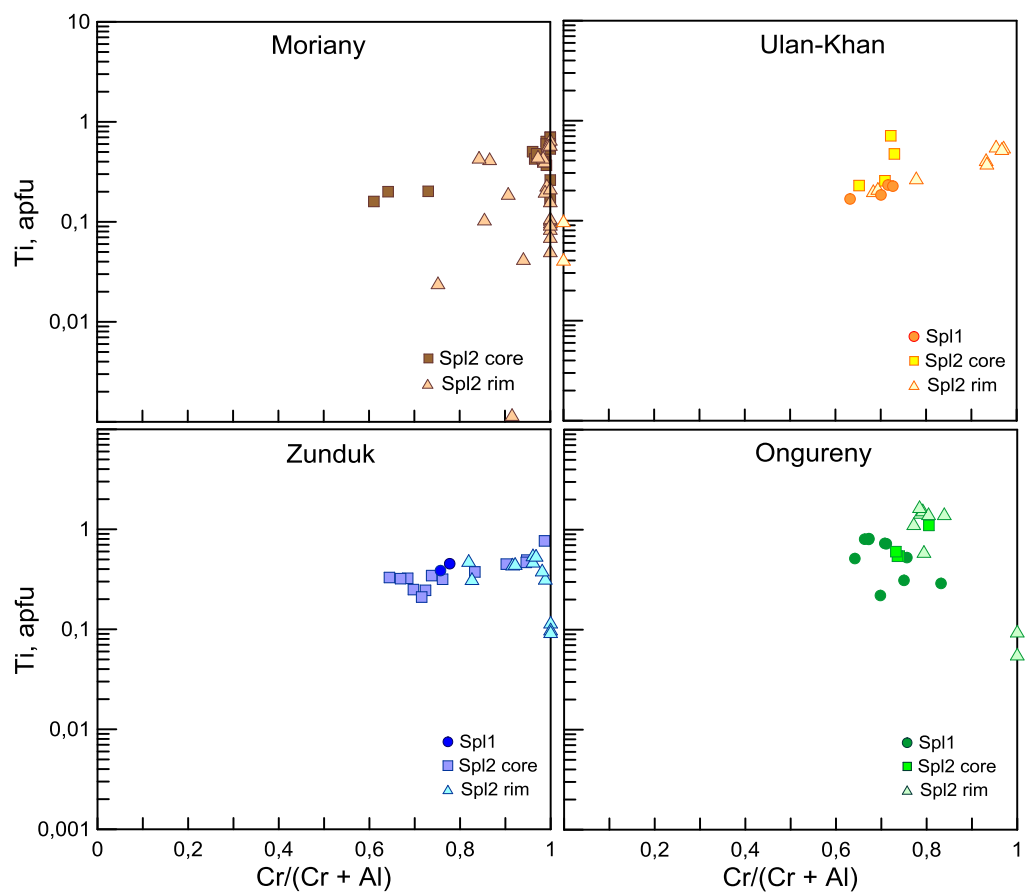

**Figure S5.** Cr/(Fe<sup>3+</sup> + Cr + Al) vs. Ti (apfu on the basis of 32 oxygen anions) diagram. The diagrams are split to avoid overcrowding. Spl1: Type I Cr-spinel; Spl2: Type II Cr-spinel.



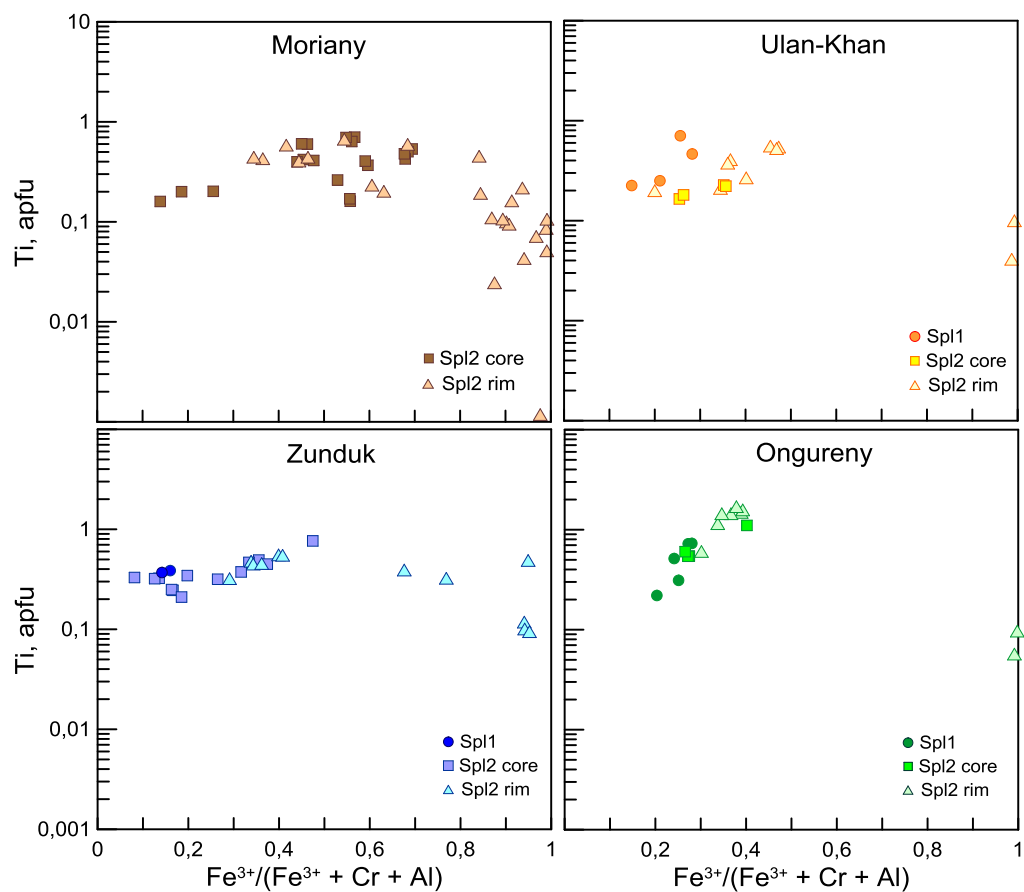

**Figure S6.**  $\text{Fe}^{3+}/(\text{Fe}^{3+} + \text{Cr} + \text{Al})$  vs. Ti (apfu on the basis of 32 oxygen anions) diagram. The diagrams are split to avoid overcrowding. Spl1: Type I Cr-spinel; Spl2: Type II Cr-spinel.

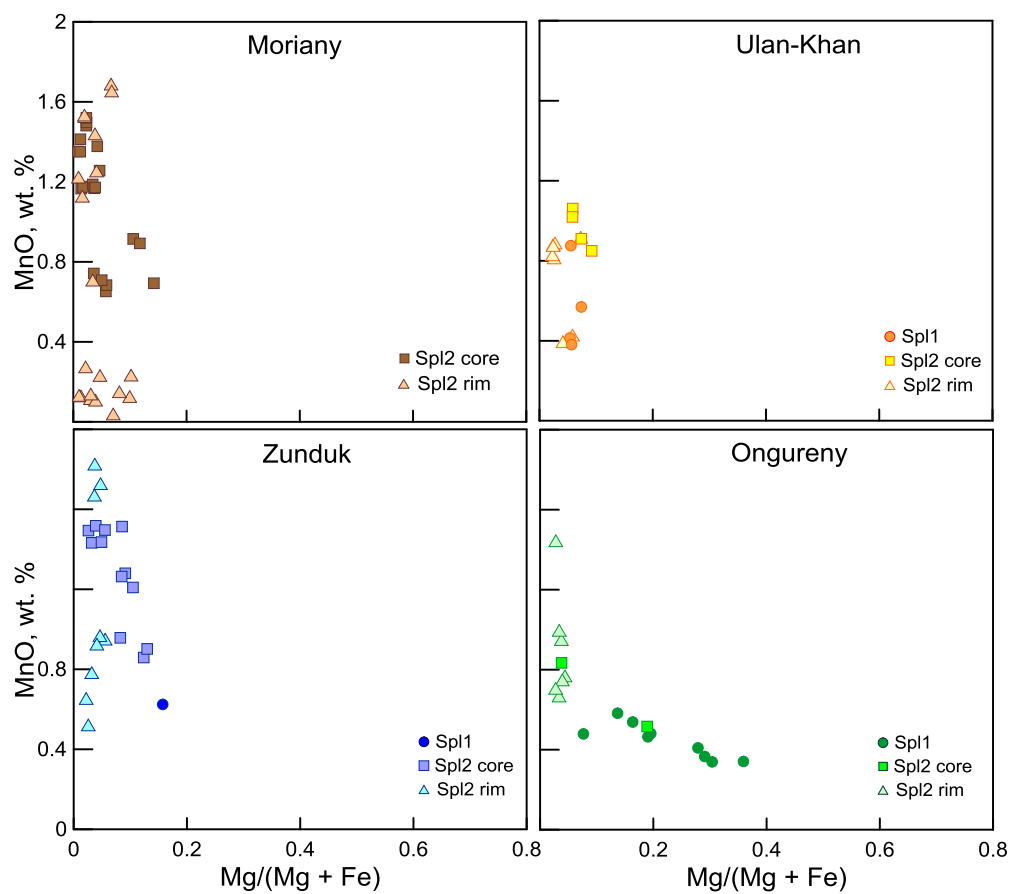

**Figure S7.** Mg/Mg+Fe<sup>2+</sup> vs MnO (wt.%) diagram. The diagrams are split to avoid overcrowding. Spl1: Type I Cr-spinel; Spl2: Type II Cr-spinel.

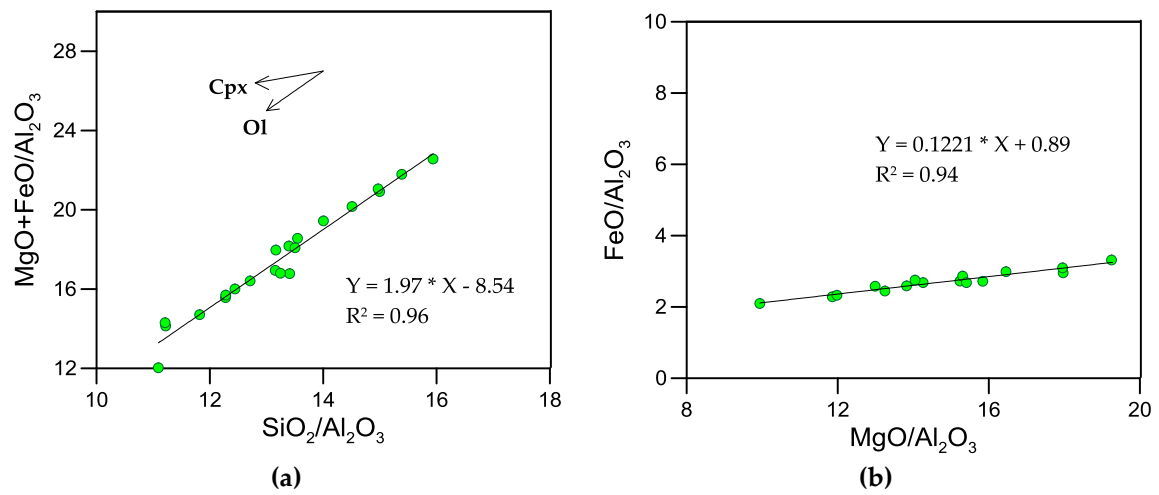

**Figure S8.** Molecular proportion ratio plot [62-64] of the Ongureny intrusion rocks. Vectors whose slopes are consistent with the fractionation of olivine (Ol) and clinopyroxene (Cpx) are shown in panel (a).
