# Supplementary material
Source: MDPI journal article supplement (https://www.mdpi.com/2075-163X/10/7/608)
Supplement: s1 [file s1]

Archive with 3 entries (3 files):
- Tables S1&S2.xlsx
- Figure S1_S8.pdf
- Table S3-S6.xlsx
