# Supplementary material
Source: MDPI journal article supplement (https://www.mdpi.com/2075-163X/10/7/608)
Supplement: s1 [file s1 › Table S3-S6.xlsx]

## Sheet: Table S3
Figure 5. (a,b) The Moriany intrusion, samples 10137 and 10132, respectively
	Table S3. Representative electron microanalyses of Cr-spinel and magnetite (wt.%) from ultramafic rocks of the Moryany intrusion.
	Sample	10137	10137	10137	10137	10137	10137	10132	10132	10132	10132	10132
	Type	Spl2	Spl2	Spl2	Spl2	Spl2	Spl2	Spl2	Spl2	Spl2	Spl2	Spl2
	Figure	5a	5a	5a	5a	5a	5a	5b	5b	5b	5b	5b
	Point	2	1	3	4	5	6	3	4	5	2	1
	TiO2	2.96	0.44	2.93	2.69	2.48	2.8	0.7	0.9	0.9	1.9	1.9
	Al2O3	bld	bld	bld	0.16	0.11	bld	15.7	13.5	8.7	4.3	3.6
	Cr2O3	25.33	0.54	26.3	25.84	34.73	26.46	36.8	36	35.1	34.6	34.7
	FeO	61.75	87.5	60.25	61.76	53.24	59.53	37.4	41	42.8	49.5	50.7
	MnO	1.19	0.13	1.17	1.17	1.44	1.25	0.7	0.9	0.9	1.7	1.7
	MgO	0.61	0.17	0.68	0.65	0.66	0.71	2.6	2.2	1.8	1.2	1.2
	NiO	0.15	0.17	0.18	0.16	0.13	0.16	0.1	0.1	bld	0.1	0.1
	ZnO	0.24	bld	0.21	0.21	0.34	0.21	0.8	0.9	0.8	0.6	0.5
	Total	92.23	88.96	91.72	92.64	93.13	91.12	99.5	100.4	96.3	100.1	100.6
	Formula units based on 4 oxygens
	Ti	0.088	0.013	0.087	0.079	0.073	0.084	0.02	0.025	0.025	0.055	0.053
	Al	0	0	0	0.007	0.005	0	0.657	0.566	0.391	0.193	0.161
	Cr	0.789	0.017	0.824	0.801	1.076	0.834	1.031	1.016	1.06	1.037	1.041
	Fe3+	1.035	1.956	1.001	1.033	0.773	0.998	0.272	0.361	0.498	0.649	0.692
	Fe2+	1.001	0.993	0.996	0.991	0.973	0.988	0.835	0.86	0.87	0.92	0.916
	Mn	0.04	0.005	0.039	0.039	0.048	0.042	0.021	0.027	0.03	0.053	0.054
	Mg	0.036	0.01	0.04	0.038	0.039	0.042	0.138	0.115	0.103	0.067	0.066
	Ni	0.005	0.006	0.006	0.005	0.004	0.005	0.004	0.003		0.005	0.004
	Zn	0.007	0	0.006	0.006	0.01	0.006	0.022	0.023	0.023	0.016	0.013
	Total	3	3	3	3	3	3	3	2.997	3	2.994	3
	Mg#	0.03	0.01	0.04	0.04	0.04	0.04	0.14	0.12	0.11	0.07	0.07
	Cr#	1	1	1	0.99	1	1	0.61	0.64	0.73	0.84	0.87
	Fe3+#	0.57	0.99	0.55	0.56	0.42	0.54	0.14	0.19	0.26	0.35	0.37
	bdl: below detection limit. «—»: no data. Mg#: Mg/(Mg + Fe2+); Cr#: Cr/(Cr+Al); Fe3#: Fe3+/(Fe3++Cr+Al). Fe3+and Fe2+ are calculated based on stoichiometry.

## Sheet: Table S4
Figure 5. (c,d) The Ulan-Khan intrusion, sample 1346.
	Table S4. Representative electron microanalyses of Cr-spinel (wt.%) from ultramafic rocks of the Ulan-Khan intrusion.
		Sample	1254	1254	1258	1258	1258	1258	1258
		Type	Spl1	Spl2	Spl2	Spl2	Spl2	Spl2	Spl2
		Figure	5c	5c	5d	5d	5d	5d	5d
		Point	8	9	1	2	3	4	5
		TiO2	0.77	1.02	1.09	1.18	0.96	1.65	1.79
		Al2O3	12.65	8.08	14.24	10.65	12.12	1.8	1.81
		Cr2O3	32.42	30.38	39.8	38.73	39.04	37.97	37.44
		FeO	46.99	52.17	40.7	44.09	44.21	52.48	52.88
		MnO	0.53	0.38	0.85	0.91	0.92	0.88	0.81
		MgO	1.36	0.97	1.74	1.35	1.36	0.43	0.46
		ZnO	0.85	0.59	1.5	1.46	1.61	0.7	0.71
		Total	96.18	94.44	99.92	98.37	100.2	95.91	95.9
		Formula units based on 4 oxygens
		Ti	0.021	0.028	0.028	0.031	0.025	0.047	0.051
		Al	0.532	0.353	0.575	0.444	0.493	0.08	0.081
		Cr	0.915	0.892	1.079	1.083	1.067	1.138	1.121
		Fe3+	0.493	0.677	0.29	0.41	0.39	0.688	0.696
		Fe2+	0.91	0.943	0.877	0.895	0.887	0.975	0.979
		Mn	0.016	0.012	0.025	0.027	0.027	0.028	0.026
		Mg	0.072	0.054	0.089	0.071	0.07	0.024	0.026
		Zn	0.022	0.016	0.038	0.038	0.041	0.02	0.02
		Total	3	3	3	3	3	3	3
		Mg#	0.07	0.05	0.09	0.07	0.07	0.02	0.03
		Cr#	0.63	0.72	0.65	0.71	0.68	0.93	0.93
		Fe3+#	0.25	0.35	0.15	0.21	0.2	0.36	0.37
	bdl: below detection limit. «—»: no data. Mg#: Mg/(Mg + Fe2+); Cr#: Cr/(Cr+Al); Fe3#: Fe3+/(Fe3++Cr+Al). Fe3+ and Fe2+ are calculated based on stoichiometry.

## Sheet: Table S5
Figure 5. (e,f) The Zunduk intrusion, sample 1346.
	Table S5. Representative electron microanalyses of Cr-spinel and Cr-magnetite (wt.%) from ultramafic rocks of the Zunduk intrusion.
	Sample	1346	1346	1346	1346	1346	1346	1346	1346	1346	1346
	Type	Spl1	Spl2	Spl2	Spl2	Spl2	Spl2	Spl2	Spl2	Spl2	Spl2
	Figure	5e	5f	5f	5f	5f	5f	5f	5f	5f	5f
	Point	6	2	1	3	4	5	6	7	8	9
	TiO2	1.79	1.47	1.48	1.52	1.96	2.01	2.08	1.43	2.36	1.6
	Al2O3	9.2	14.33	12.17	13.37	2.33	2.12	0.38	7.76	0.79	0.24
	Cr2O3	42.62	38.64	39.39	40.22	37.82	37.17	2.53	36.94	34.99	18.59
	FeO	38.81	33.75	36.85	37.44	50.37	52.09	84.7	46.19	53.93	66.66
	MnO	0.62	0.83	0.86	0.9	0.95	0.97	0.78	0.96	0.93	0.52
	MgO	2.99	2.62	2.24	2.45	0.99	0.83	0.56	1.49	0.73	0.43
	NiO	0.11	0.12	0.12	0.12	0.11	0.16	0.16	0.14	0.13	0.2
	ZnO	0.24	1.03	1.07	0.95	0.49	0.44	0.32	0.63	0.44	0.19
	Total	96.38	92.79	94.49	96.97	95.01	95.77	91.51	95.74	94.3	88.43
	Formula units based on 4 oxygens
	Ti	0.048	0.04	0.04	0.04	0.056	0.057	0.061	0.04	0.069	0.049
	Al	0.389	0.616	0.521	0.554	0.104	0.094	0.017	0.335	0.036	0.012
	Cr	1.209	1.114	1.13	1.119	1.135	1.109	0.078	1.07	1.067	0.601
	Fe3+	0.305	0.189	0.259	0.246	0.648	0.683	1.782	0.51	0.76	1.289
	Fe2+	0.86	0.84	0.859	0.855	0.951	0.961	0.987	0.906	0.978	0.99
	Mn	0.019	0.026	0.026	0.027	0.031	0.031	0.026	0.03	0.03	0.018
	Mg	0.16	0.142	0.121	0.129	0.056	0.047	0.033	0.082	0.042	0.026
	Ni	0.003	0.005	0.005	0.005	0.004	0.006	0.007	0.005	0.005	0.009
	Zn	0.006	0.028	0.029	0.025	0.014	0.012	0.009	0.017	0.013	0.006
	Total	3	3	3	3	3	3	3	3	3	3
	Mg#	0.16	0.14	0.12	0.13	0.06	0.05	0.03	0.08	0.04	0.03
	Cr#	0.76	0.64	0.68	0.67	0.92	0.92	0.82	0.76	0.97	0.98
	Fe3+#	0.16	0.1	0.14	0.13	0.34	0.36	0.95	0.27	0.41	0.68
	Mg#: Mg/(Mg + Fe2+); Cr#: Cr/(Cr+Al); Fe3#: Fe3+/(Fe3++Cr+Al). Fe3+and Fe2+ are calculated based on stoichiometry.

## Sheet: Table S6
Figure 5. (g,h) The Onguren intrusion, samples 1559 and 1567, respectively.
	Table S6. Representative electron microanalyses of Cr-spinel and magnetite (wt.%) from ultramafic rocks of the Onguren intrusion.
	Sample	1559	1559	1559	1567	1567	1567	1567	1567	1567
	Figure	5g	5g	5g	5h	5h	5h	5h	5h	5h
	Point	7	11	12	1	2	3	5	6	4
	Type	Spl1	Spl1	Spl1	Spl2	Spl2	Spl2	Spl2	Spl2	Spl2
	TiO2	1.06	1.48	2.53	5.05	0.41	2.64	2.64	2.87	0.24
	Al2O3	11.5	8.71	8.06	4.7	bdl	8.93	8.72	8.83	bdl
	Cr2O3	39.65	38.92	37.31	28.95	0.13	37.05	36.93	35.98	0.553
	FeO	41.57	44.49	44.07	57.72	90.967	43.41	43.84	45.95	90.827
	MnO	0.48	0.46	0.41	0.83	bdl	0.34	0.37	0.52	bdl
	MgO	3.8	3.7	5.66	0.77	bdl	6.27	5.97	3.81	0.139
	NiO	0.14	0.17	0.16	0.15	bdl	0.21	0.2	0.21	bdl
	ZnO	0.37	0.16	0.11	0.28	bdl	0.13	0.15	0.16	bdl
	Total	98.73	98.08	98.3	98.45	91.7	98.99	98.81	98.31	91.862
	Formula units based on 4 oxygens
	Ti	0.027	0.039	0.066	0.138	0.012	0.068	0.068	0.075	0.007
	Al	0.468	0.36	0.328	0.201	0	0.359	0.352	0.364	0
	Cr	1.082	1.079	1.02	0.831	0.004	0.999	1	0.994	0.017
	Fe3+	0.395	0.483	0.52	0.693	1.972	0.507	0.512	0.491	1.969
	Fe2+	0.805	0.823	0.755	1.059	1.012	0.73	0.744	0.852	0.999
	Mn	0.014	0.014	0.012	0.026	0	0.01	0.011	0.015	0
	Mg	0.195	0.193	0.292	0.042	0	0.319	0.305	0.199	0.008
	Ni	0.004	0.005	0.005	0.005	0	0.006	0.005	0.006	0
	Zn	0.009	0.004	0.003	0.007	0	0.003	0.004	0.004	0
	Total	3	3	3	3	3	3	3	3	3
	Mg#	0.2	0.19	0.28	0.04	0	0.3	0.29	0.19	0.01
	Cr#	0.7	0.75	0.76	0.81	1	0.74	0.74	0.73	1
	Fe3+#	0.2	0.25	0.28	0.4	1	0.27	0.27	0.27	0.99
	bdl: below detection limit. Mg#: Mg/(Mg + Fe2+); Cr#: Cr/(Cr+Al); Fe3#: Fe3+/(Fe3++Cr+Al). Fe3+and Fe2+ are calculated based on stoichiometry.
