# Supplementary material
Source: MDPI journal article supplement (https://www.mdpi.com/2075-163X/10/7/608)
Supplement: s1 [file s1 › Tables S1&S2.xlsx]

## Sheet: Table S1
	Table S1. Bulk-rock major elements (wt.%), Cr and Ni (ppm) contents of ultramafic rocks from the Primorsky Ridge (Western Baikal region).
	Sample	SiO2	TiO2	Al2O3	Fe2O3	FeO	MnO	MgO	CaO	Na2O	K2O	P2O5	LOI	Total	Cr	Ni	Mg#
	The Moriany intrusion
	10132	39.66	0.231	4.99	11.32*		0.171	30.144	3.358	0.026	0.066	0.036	9.85	99.852	4120	1270	0.842114
	10133	40.73	0.211	5.51	12.1		0.19	28.81	3.423	0.07	0.033	0.033	9.04	100.15	4560	1130	0.82666
	10134	40.05	0.179	6.06	11.97		0.177	28.677	3.987	0.052	0.051	0.031	8.89	100.124	3620	1050	0.827543
	10135	39.71	0.163	6.37	11.67		0.173	28.182	3.925	0.025	0.138	0.034	9.7	100.09	4220	1110	0.828678
	10136	40.09	0.2	5.65	12.07		0.185	29.309	3.504	0.083	0.038	0.037	9.14	100.306	2860	1170	0.829459
	10137	39.19	0.215	4.71	12.36		0.183	30.758	2.352	0.053	0.037	0.038	10.29	100.186	3970	1140	0.832898
	10139	39.06	0.24	5.55	12.3		0.174	30.005	2.009	0.052	0.107	0.047	10.32	99.864	10340	1350	0.830107
	10141	38.56	0.168	4.87	12.26		0.178	31.467	1.772	0.085	0.026	0.034	10.59	100.01	10270	1380	0.837156
	10142	39.8	0.198	5.68	12.4		0.173	28.918	3.791	0.084	0.072	0.042	9.14	100.298	2170	1250	0.823667
	10143	39.04	0.213	4.74	12.3		0.175	30.584	2.47	0.072	0.034	0.036	10.41	100.074	6660	1210	0.832786
	10144	38.87	0.197	4.75	11.92		0.175	31.439	2.552	0.086	0.03	0.033	10.13	100.182	5940	1220	0.840835
	10145	39.4	0.199	4.93	11.92		0.174	30.242	3.607	0.083	0.036	0.035	9.56	100.186	3500	1160	0.835571
	10146	39.45	0.194	4.22	12.66		0.163	30.79	2.972	0.06	0.025	0.026	9.7	100.26	4050	1410	0.829681
	10147	39.48	0.163	4.81	12.06		0.159	30.43	3.373	0.076	0.03	0.041	9.63	100.252	3190	1240	0.834817
	10148	38.56	0.189	4.63	12.45		0.173	31.092	2.354	0.09	0.033	0.04	10.21	99.821	3100	1420	0.833391
	10149	39.1	0.256	5.32	12.75		0.186	30.811	2.185	0.036	0.033	0.045	9.72	100.442	500	1380	0.828774
	10150	39.17	0.237	4.75	12.99		0.155	29.245	2.826	0.073	0.029	0.041	11.01	100.526	500	1390	0.81849
	10151	41.83	0.261	5.53	12.51		0.167	27.724	3.852	0.07	0.028	0.049	8.44	100.461	400	1200	0.816137
	10152	40.87	0.21	4.46	12.27		0.177	28.622	3.831	0.067	0.028	0.039	9.75	100.324	1160	1190	0.823703
	The Ulan-Khan intrusion
	1258	41.34	0.27	8.65	8.56*		0.106	28.303	4.765	bdl	0.07	0.05	7.73	99.844	2410	950	0.868812
	1254	41.56	0.344	6.16	12.53		0.179	27.069	5.219	bdl	0.064	0.063	6.85	100.038	2010	800	0.812279
	1251	43.82	0.3	6.85	10.54		0.162	25.838	6.378	bdl	0.01	0.041	5.92	99.859	1190	510	0.830798
	1252	41.11	0.33	5.71	12.06		0.173	27.658	8.276	0.72	0.34	0.05	2.6	99.027	1550	620	0.821221
	1253	41.81	0.365	6.24	12.1		0.174	26.64	7.441	0.75	0.493	0.058	3.05	99.121	3580	970	0.815151
	1410	41.31	0.418	5.66	13.63		0.16	27.344	3.594	bdl	0.01	0.057	7.97	100.153	3980	1120	0.800728
	1420	44.42	0.338	6.62	10.84		0.152	24.696	6.446	bdl	0.029	0.039	6.57	100.15	3110	1000	0.820247
	1430	38.57	0.2	4.37	13.08		0.147	30.999	3.327	bdl	0.052	0.074	9.48	100.299	2200	1250	0.825994
	1440	39.92	0.227	4.57	13.31		0.176	30.439	3.447	bdl	0.26	0.042	7.73	100.121	480	1360	0.820808
	1450	40.33	0.261	5.01	12.96		0.173	30.141	3.858	0.23	0.185	0.044	7.2	100.392	2440	1300	0.823267
	1460	44.27	0.382	7.59	11.63		0.139	25.414	3.777	bdl	0.152	0.059	6.84	100.253	1480	950	0.814019
	The Zunduk intrusion
	1341	38.98	0.15	6.64	6.19	6.44	0.14	28.4	3.32	0.02	0.01	0.04	8.62	98.95	2700	1200	0.809046
	1342	39.24	0.24	5.7	5.62	6.76	0.18	29.15	2.98	0.03	0.02	0.05	8.77	98.74	4800	1200	0.81543
	1343	39.49	0.26	4.06	5.13	6.57	0.16	30.14	3.18	0.01	0.06	0.05	9.28	98.39	2200	1300	0.828323
	1344	42.65	0.39	6.91	3.89	6.97	0.13	25.5	5.24	0.02	0.02	0.05	6.98	98.75	3400	1100	0.813343
	1345	41.58	0.32	6.98	4.98	6.55	0.15	26.42	4.33	0.06	0.07	0.06	7.67	99.17	3900	1100	0.81091
	1346	40.8	0.21	4.71	3.84	8.46	0.17	30.9	3.16	0.11	0.15	0.05	5.81	98.37	4300	1600	0.822619
	1347	39.84	0.24	5.54	5.11	6.81	0.18	29.32	3.41	0.05	0.05	0.05	8	98.6	5400	1400	0.821486
	1348	40.15	0.27	5.5	4.99	6.98	0.17	28.21	3.36	0.04	0.05	0.06	9.17	98.95	1400	1200	0.81492
	1349	39.3	0.25	4.72	5.32	7.21	0.16	29.18	2.96	0.01	0.01	0.05	9.4	98.57	2800	1400	0.813251
	13140	39.95	0.27	5.38	3.54	8.24	0.16	29.54	3.21	0.07	0.1	0.05	7.95	98.46	4500	1300	0.822159
	The Ongureny intrusion
	1550	40.98	0.243	4.52	2.02	9.43	0.181	32.878	3.42	0.14	0.29	0.044	4.54	100.56	3300	1400	0.839229
	1551	40.25	0.266	5.49	2.98	7.19	0.163	29.637	3.83	0.04	0.16	0.044	8.93	100.97	4000	1300	0.842962
	1551а	39.24	0.263	4.59	3.53	6.48	0.155	31.614	3.07	0.02	0.04	0.04	9.3	101.36	4200	1400	0.854168
	1552	41	0.255	5.19	3.45	8.11	0.154	28.606	3.83	0.06	0.17	0.047	8.11	100.79	1200	1300	0.820175
	1553	39.51	0.39	4.95	3.32	7.23	0.172	30.993	4.28	0.05	0.13	0.125	7.19	100.22	4300	1400	0.84435
	1554	40.44	0.323	5.59	3.18	8.15	0.173	28.699	4.38	0.04	0.11	0.062	8.41	100.89	300	1400	0.823299
	1555	38.86	0.337	5.01	4.47	6.54	0.157	30.173	3.7	0.03	0.05	0.11	9.26	100.76	2000	1400	0.836433
	1556	40.53	0.233	6.13	3.24	7.77	0.162	28.73	4.01	0.06	0.11	0.042	8.54	101	300	1400	0.827803
	1557	38.88	0.358	4.4	4.18	6.29	0.153	31.245	3.53	0.02	0.06	0.087	9.35	100.85	3100	1300	0.847657
	1558	41.34	0.266	5.52	2.62	8.32	0.163	30.158	3.98	0.22	0.24	0.046	6.66	101.07	3500	1400	0.834631
	1559	40.35	0.222	4.89	2.64	8.56	0.176	31.8	3.68	0.08	0.13	0.044	6.58	100.82	2500	1400	0.838609
	1560	40.26	0.281	5.78	3.3	6.68	0.172	28.642	4.43	0.08	0.24	0.049	8.18	100.09	4100	1200	0.8415
	1561	40.38	0.257	5.21	2.65	8.32	0.168	29.365	4.23	0.05	0.21	0.039	8.63	100.85	2200	1300	0.830568
	1562	42.3	0.278	5.42	3.15	8.12	0.177	30.092	4.38	0.05	0.26	0.049	3.42	99.55	1000	1300	0.830818
	1563	40.29	0.284	6.1	3.45	7.7	0.171	28.879	4.31	0.1	0.26	0.047	7.43	100.21	4100	1300	0.826983
	1565	41.44	0.264	5.25	2.56	8.71	0.177	31.761	3.81	0.29	0.28	0.044	4.34	100.72	4100	1500	0.837465
	1568	40.38	0.276	5.58	3.3	7.54	0.159	29.221	3.77	0.04	0.11	0.046	8.72	100.55	3800	1300	0.832548
	1569	39.86	0.238	5.01	3	7.63	0.17	30.51	3.46	0.03	0.11	0.043	9.08	100.94	2800	1300	0.840774
	1570	39.16	0.215	4.44	3.67	7.33	0.15	31.51	2.94	0.03	0.05	0.033	9.48	100.83	2900	1300	0.841294
	1571	39.44	0.213	4.2	3.63	7.43	0.156	31.95	2.72	0.02	0.05	0.042	9.49	101.47	300	1400	0.842334
	1572	42.55	0.26	6.51	2.86	7.99	0.175	25.562	3.98	0.07	0.14	0.05	8.08	99.68	1500	1300	0.812213
	bdl: below detection limit; *: Fe2O3 total; Mg# = MgO/(MgO+FeOtotal)

## Sheet: Table S2
	Table S2. Trace-element (ppm) composition of ultramafic rock from the Primorsky Ridge (Western Baikal region).
	Sample	10143	10150	1258	1254	1346	1347	1565	1568		Detection limit
	Intrusion	Moriany		Ulan-Khan		Zunduk		Ongureny
	Ti	1048	1248	1527	1835	1175	1449	1668	1896		4.62
	Rb	0.8	1.35	8	18	15	9.8	20	12.7		0.022
	Sr	34.9	95	77	208	55	44	77	32		0.19
	Y	5	6.8	8	10.1	4.58	5.2	6.4	6.6		0.0055
	Zr	14.5	11.4	38	44	18	11.7	33	29		0.077
	Nb	1.76	2.43	2.98	3.62	1.43	1.52	1.9	1.8		0.0095
	Cs	0.59	2.09	3.31	5	6	3.75	3.1	3.2		0.0007
	La	4.11	3.7	6.6	7	3.89	4.26	5.2	5.6		0.0042
	Ce	7.3	8.6	13.1	14.4	7.6	9	10.8	11.8		0.014
	Pr	0.84	1.04	1.49	1.64	0.92	1.08	1.23	1.28		0.0008
	Nd	3.5	4.37	5.8	6.6	3.77	4.43	4.9	5.1		0.013
	Sm	0.76	1.08	1.37	1.58	0.8	0.93	1.07	1.1		0.0021
	Eu	0.23	0.32	0.3	0.41	0.25	0.31	0.31	0.35		0.0095
	Gd	0.67	0.86	1.16	1.31	0.77	0.93	1.09	1.18		0.0013
	Tb	0.11	0.16	0.2	0.23	0.13	0.16	0.2	0.21		0.0004
	Dy	0.85	1.2	1.44	1.77	0.86	1.03	1.15	1.12		0.001
	Ho	0.18	0.25	0.3	0.37	0.19	0.22	0.24	0.24		0.0002
	Er	0.53	0.72	0.86	1.09	0.56	0.6	0.75	0.72		0.0016
	Tm	0.077	0.1	0.12	0.16	0.084	0.092	0.1	0.1		0.0001
	Yb	0.51	0.69	0.79	1.04	0.55	0.59	0.68	0.69		0.0004
	Lu	0.085	0.11	0.12	0.17	0.083	0.096	0.11	0.11		0.0001
	Hf	0.48	0.37	0.96	1.15	0.53	0.41	0.88	0.8		0.0031
	Pb	0.96	0.98	5.9	2.32	3.99	2.2	1.23	0.55		0.093
	Th	0.63	0.74	0.94	1.11	0.76	0.63	0.75	0.71		0.0013
	U	0.096	0.17	0.14	0.16	0.21	0.12	0.14	0.13		0.0008
